# Supplementary material for: Microbiota of the Digestive Gland of Red Abalone (Haliotis rufescens) Is Affected by Withering Syndrome
Source: MDPI journal article supplement (doi:10.3390/microorganisms8091411), 2020-09-13
Supplement: s1 [file s1]

## Supplementary material

Figure 1S. Macroscopic and histologic images of healthy and WS-affected abalones.

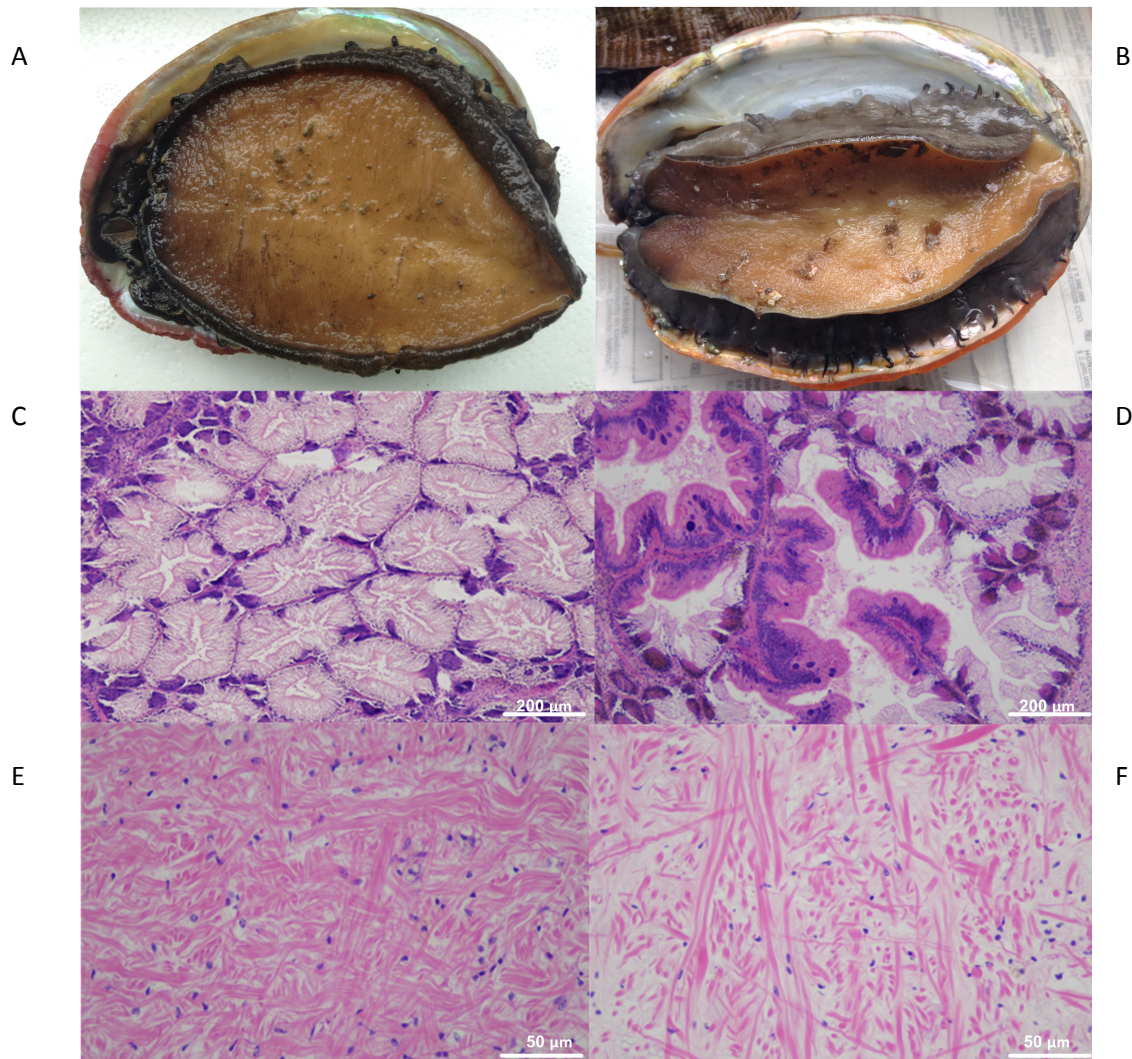

The figure shows three images of an apparently healthy abalone without pathognomonic signs of withering syndrome on the left (figures A, C, E), and the three images on the right (B, D, F), correspond to an infected animal.

A: Macroscopic image of an abalone that looks healthy, no signs of the disease, with a full foot, that fills the whole shell.

B: Macroscopic image of a diseased abalone with a retracted and “withered” foot.

C: Normal and healthy digestive gland, the digestive tubules perform intracellular digestion.

D: End stage of the disease in red abalone: metaplasia (adult tissue turning to another adult tissue, which is irreversible). *Candidatus Xenohaliotis californiensis*, the bacterium that causes withering syndrome, cannot invade the digestive diverticulae, so it apparently triggers the transformation of this tissue to a postesophagous-like tissue, where it thrives. As seen in this picture, there is only a small part of digestive tissue left, so the abalone can not digest its food, and has to digest his foot proteins.

E: healthy abalone foot, with plenty of muscle fibers.

F: Abalone with metaplasia with diminished muscle fibers.

Table S1.- Reads obtained from healthy and disease specimens from Illumina sequencing.

| Sample healthy | input  | nonchim | Sample WS | input  | nonchim |
|----------------|--------|---------|-----------|--------|---------|
| H1             | 60323  | 32754   | WS1       | 67794  | 56938   |
| H2             | 55290  | 34750   | WS2       | 65904  | 40443   |
| H3             | 60913  | 34016   | WS3       | 67165  | 38845   |
| H4             | 50991  | 34977   | WS4       | 241500 | 165430  |
| H5             | 296989 | 170119  | WS5       | 51793  | 37821   |
| Total Healthy  | 524506 | 306616  | Total WS  | 494156 | 339477  |

Input are raw reads.

Nonchim are reads after filtering chimeras.
